# Supplementary material for: Folic acid inhibits COLO-205 colon cancer cell proliferation through activating the FRα/c-SRC/ERK1/2/NFκB/TP53 pathway: in vitro and in vivo studies
Source: PubMed Central journal article supplement (PMC4460902; doi:10.1038/srep11187), 2015-06-09
Supplement: srep11187-s1.pdf [file srep11187-s1.pdf]

**Folic acid inhibits COLO-205 colon cancer cell proliferation through activating the FR  $\alpha$ /c-SRC/ERK1/2/NF  $\kappa$  B/TP53 pathway: *in vitro* and *in vivo* studies**

Chun-Ting Kuo<sup>1</sup>, Chieh Chang<sup>2</sup> and Wen-Sen Lee<sup>1,3,4\*</sup>

<sup>1</sup>Graduate Institutes of Medical Sciences, College of Medicine, Taipei Medical University, Taipei 110, Taiwan

<sup>2</sup>School of Pharmacy, Taipei Medical University, Taipei 110, Taiwan

<sup>3</sup>Department of Physiology, School of Medicine, College of Medicine, Taipei Medical University, Taipei 110, Taiwan

<sup>4</sup>Cancer Research Center, Taipei Medical University Hospital, Taipei 110, Taiwan

**\*Corresponding author at:** Graduate Institute of Medical Sciences, Taipei Medical University, 250 Wu-Hsing Street, Taipei 110, Taiwan. Phone: +886-2-27361661 ext. 3221. Fax: +886-2-23778620. E-mail: [wslee@tmu.edu.tw](mailto:wslee@tmu.edu.tw)

**A**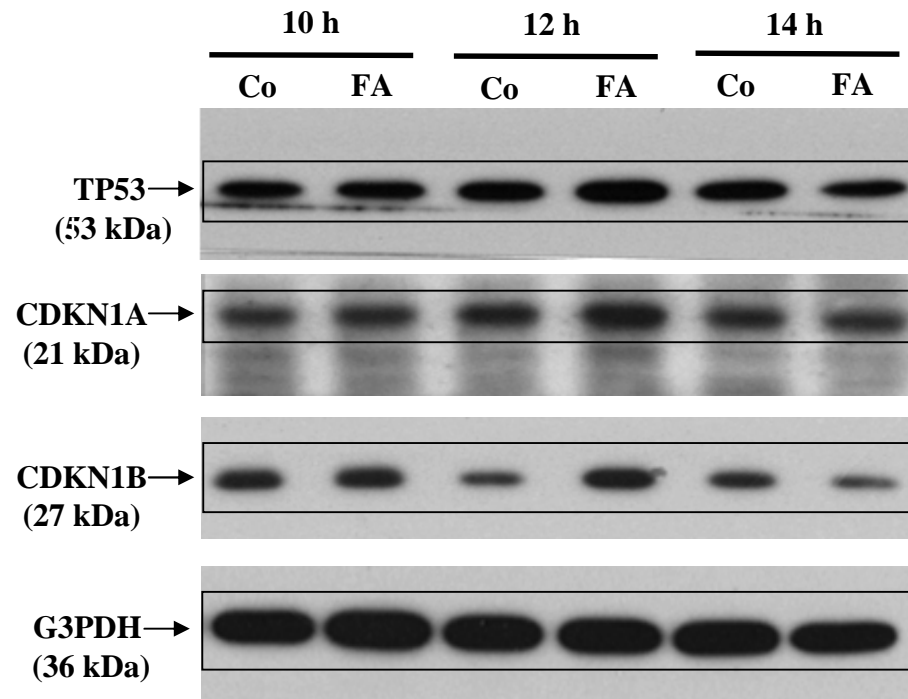**B**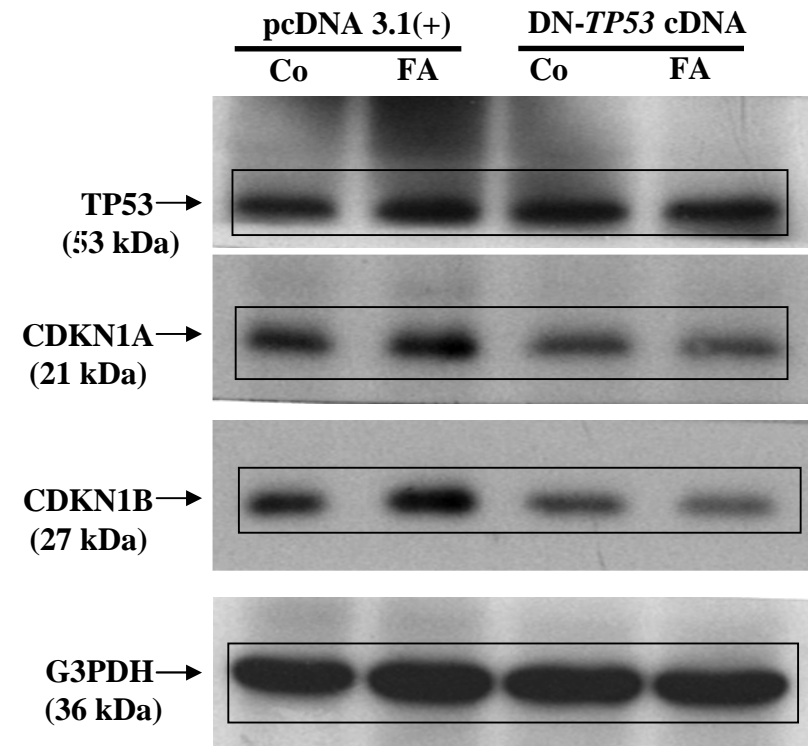

**Suppl. Fig. 1. The entire gel pictures of Figures 1 and 2 in the text.** (A) Corresponding to Fig. 1C. (B) Corresponding to Fig. 2A. The cropping lines and the molecular weight of each protein were indicated .

**A**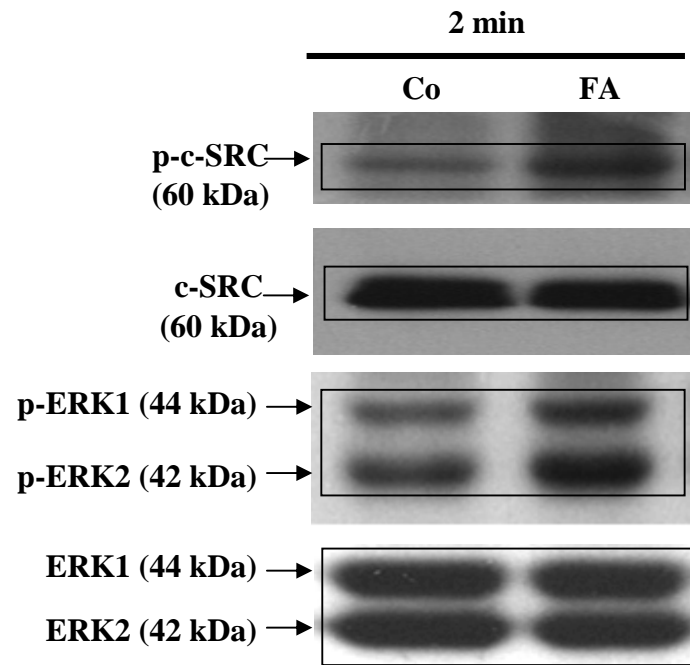**B**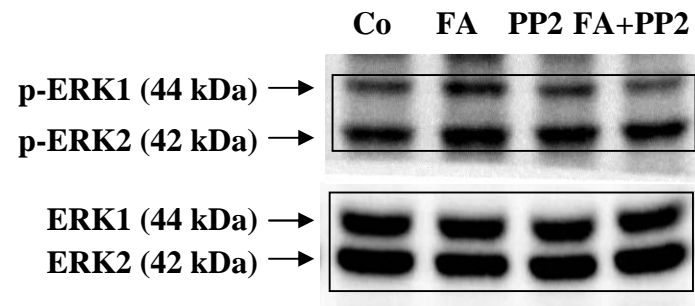**C**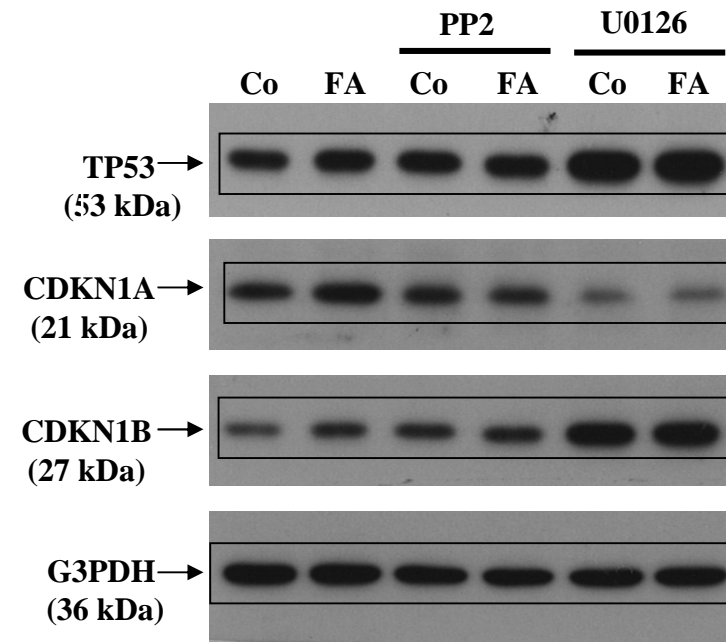

**Suppl. Fig. 2. The entire gel pictures of Figure 3 in the text.** (A) Corresponding to Fig. 3A. (b) Corresponding to Fig. 3B. (c) Corresponding to Fig. 3C. The cropping lines and the molecular weight of each protein were indicated.

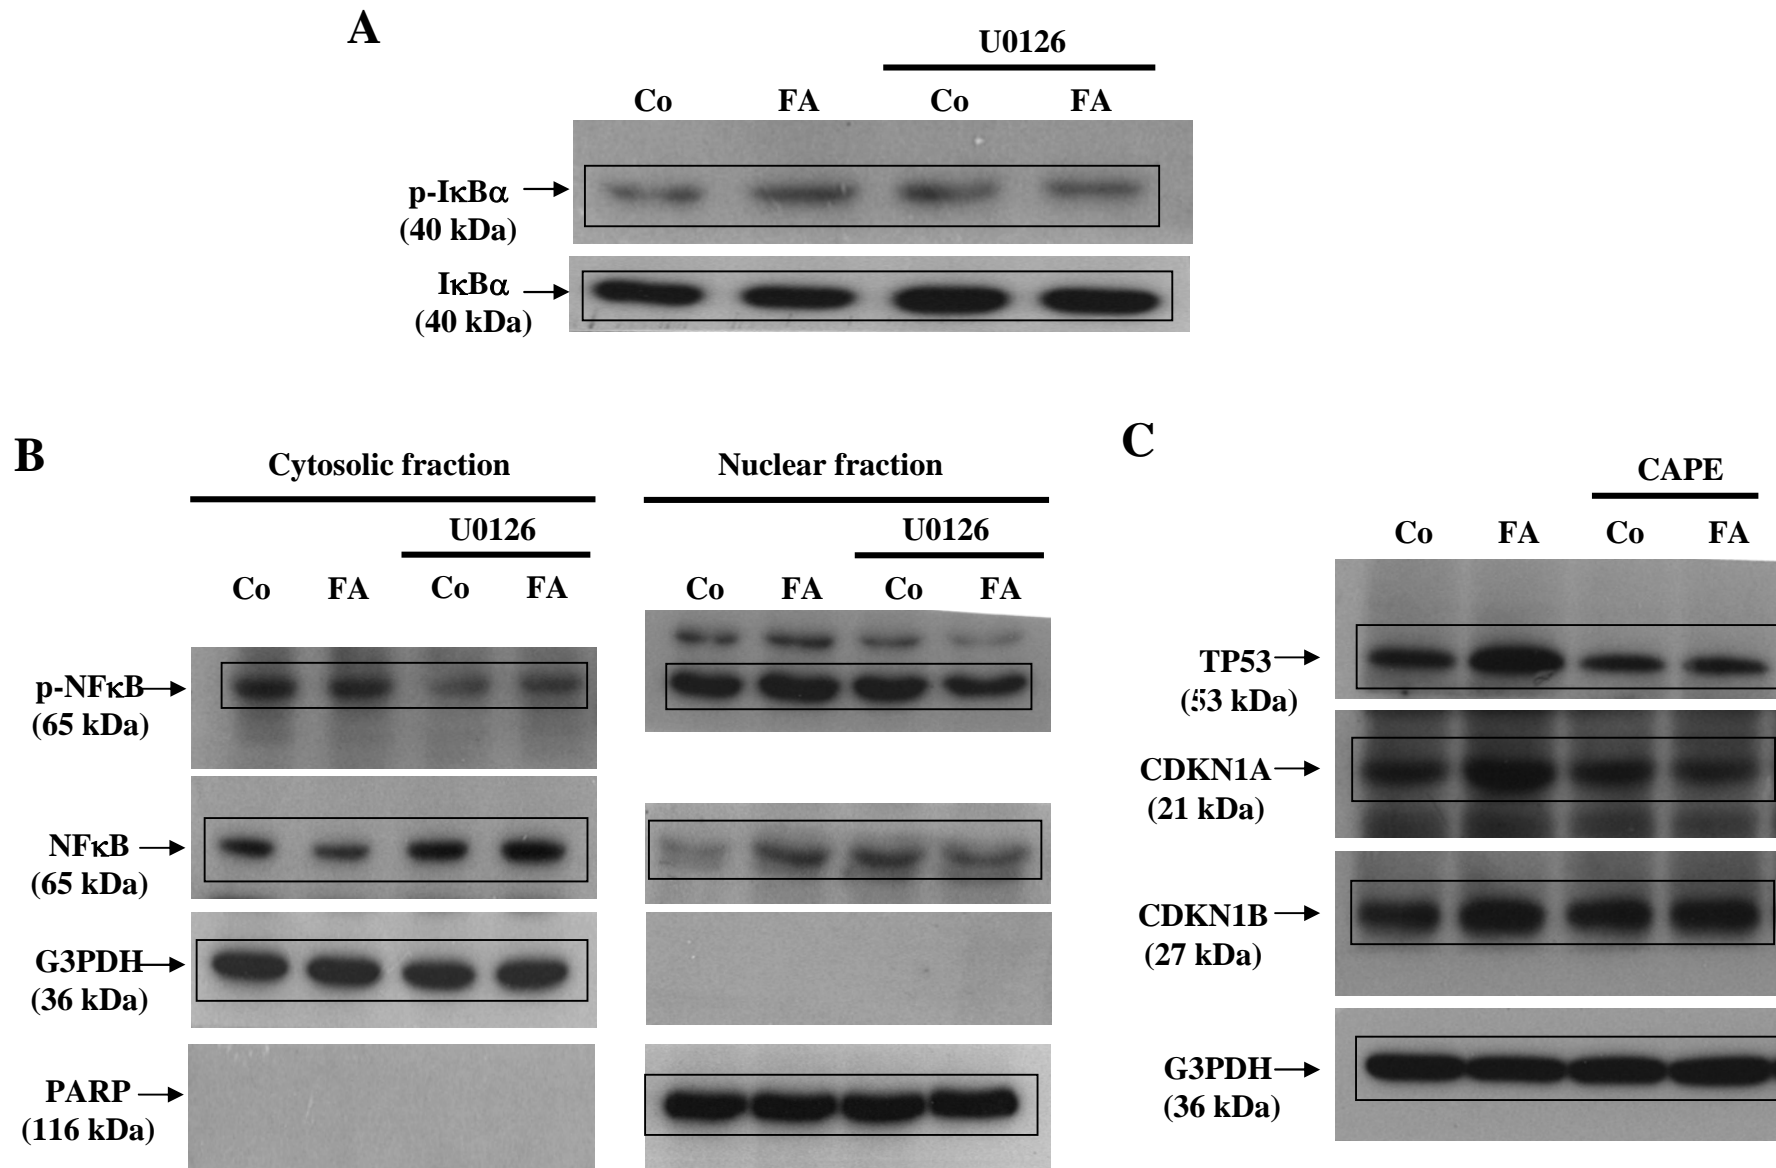

**Suppl. Fig. 3. The entire gel pictures of Figure 4 in the text.** (A) Corresponding to Fig. 4A. (B) Corresponding to Fig. 4B. (C) Corresponding to Fig. 4C. The cropping lines and the molecular weight of each protein were indicated .

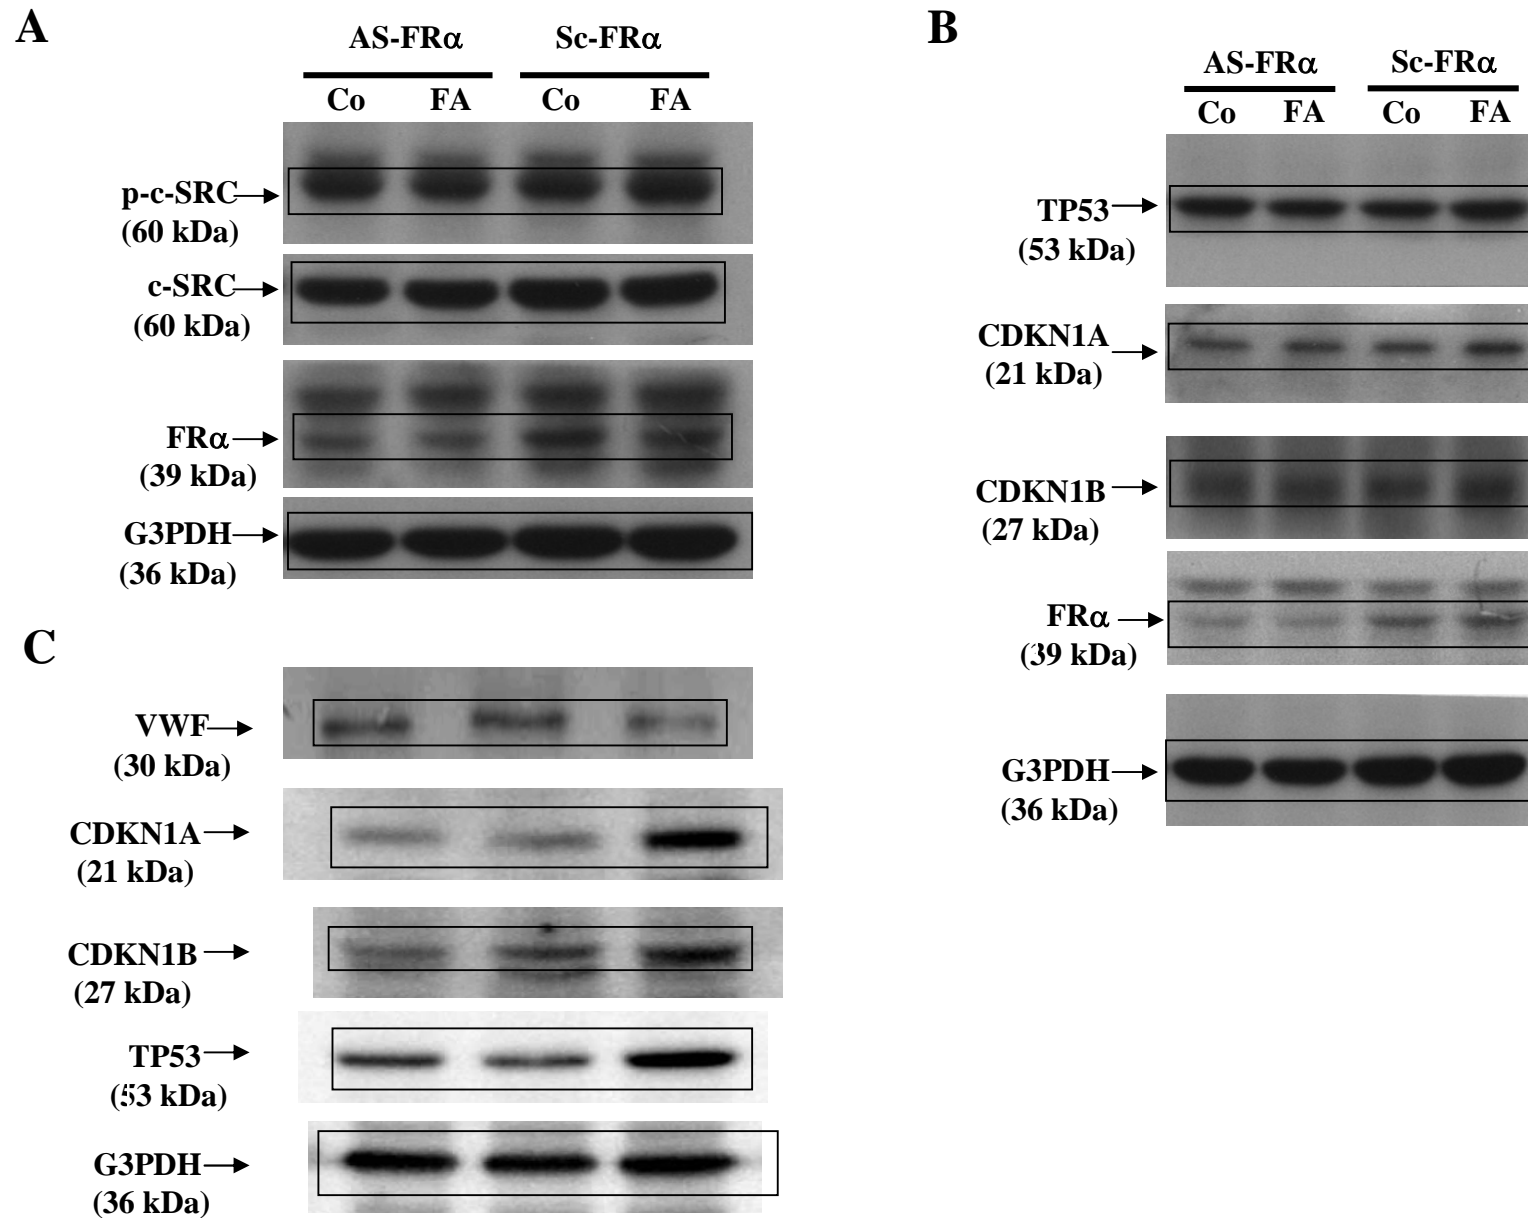

**Suppl. Fig. 4. The entire gel pictures of Figures 5 and 6 in the text. (A) Corresponding to Fig. 5B. (B) Corresponding to Fig. 5C. (C) Corresponding to Fig. 6A. The cropping lines and the molecular weight of each protein were indicated.**

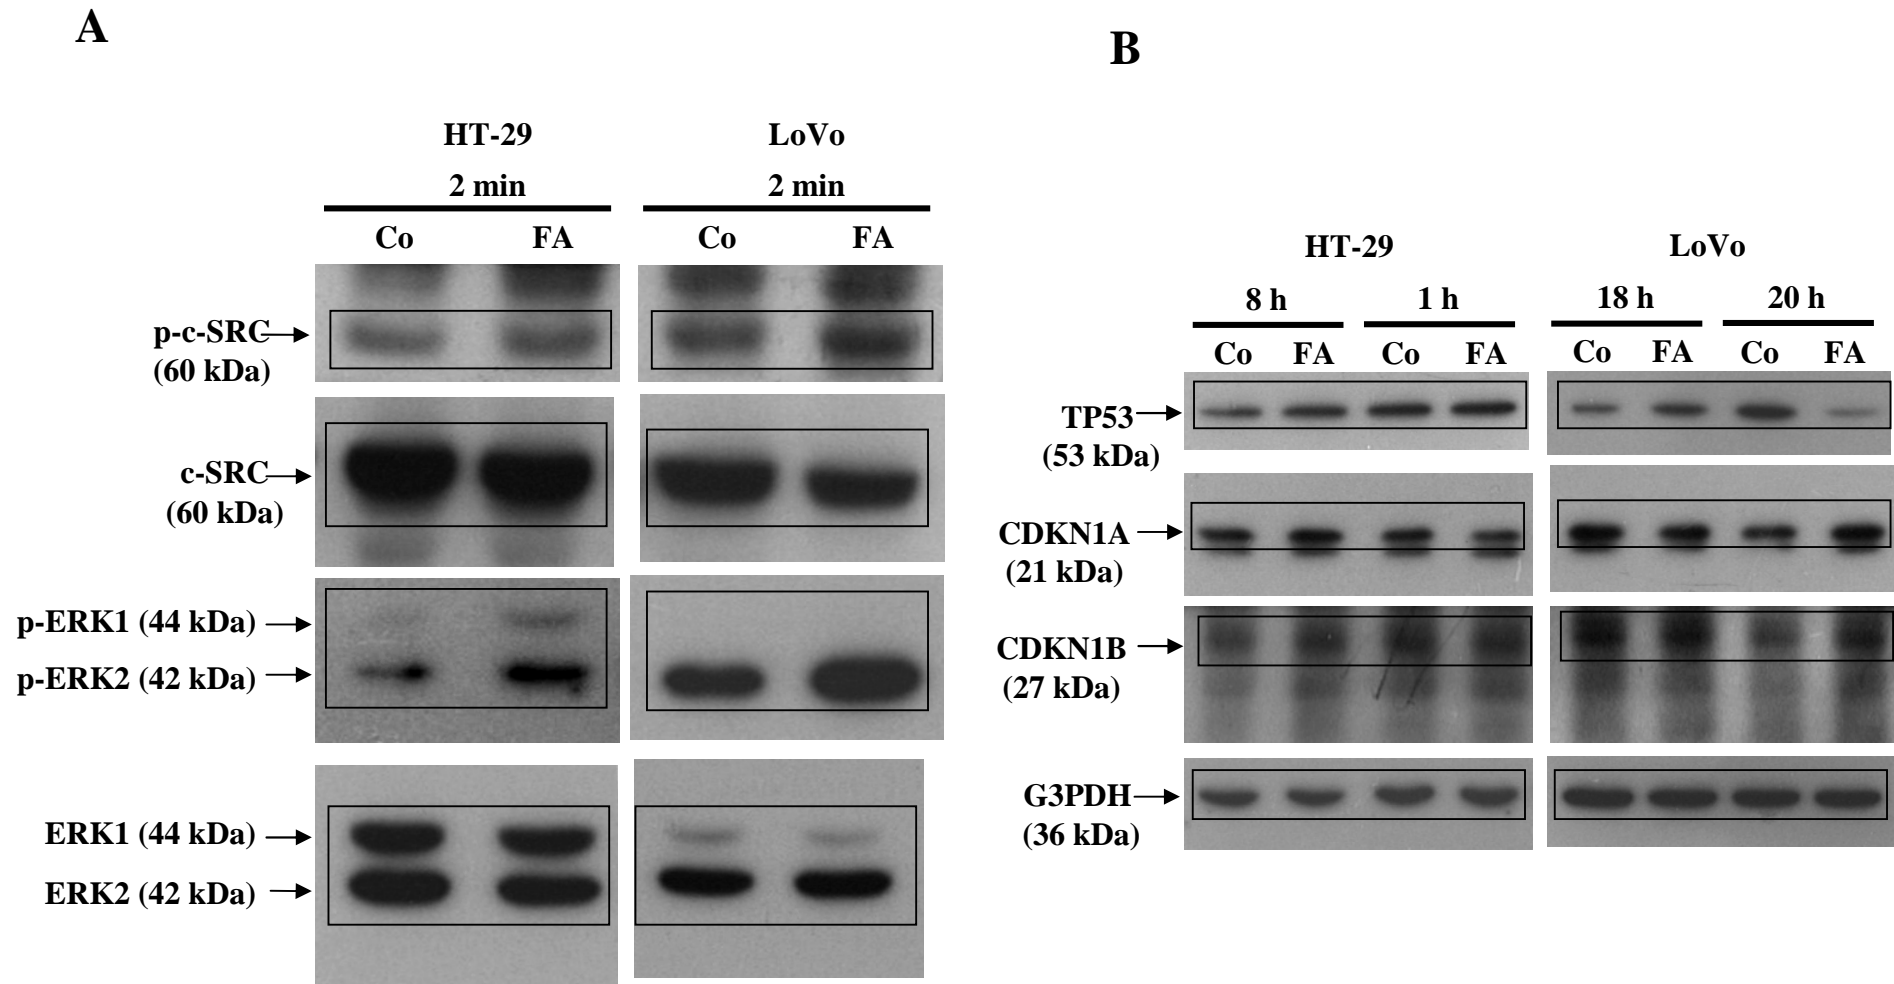

**Suppl. Fig. 5. The entire gel pictures of Figure 7 in the text.** (A) Corresponding to Fig. 7C. (B) Corresponding to Fig. 7D. The cropping lines and the molecular weight of each protein were indicated .

**A**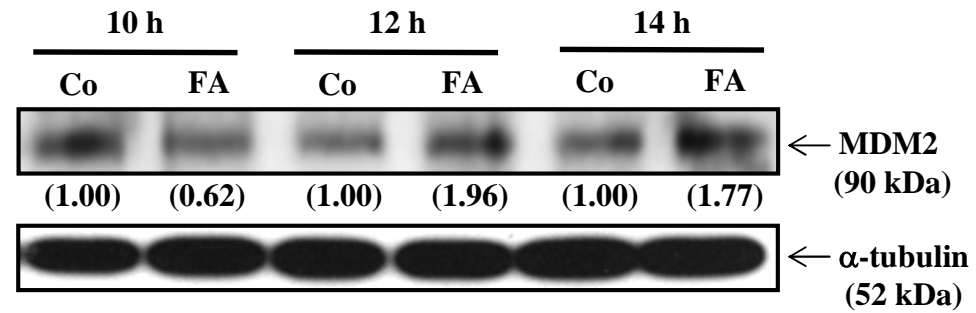**B**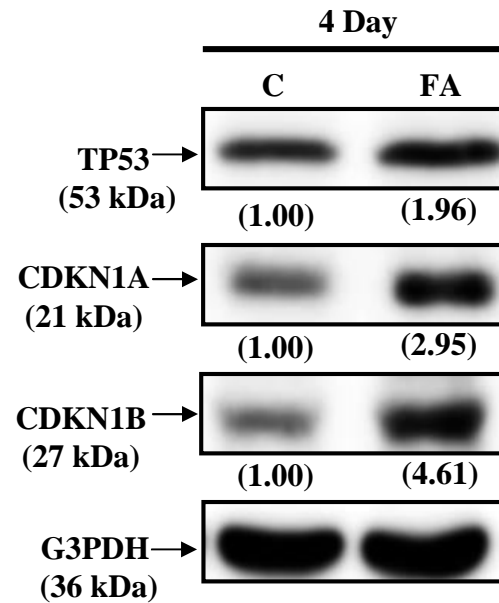

**Suppl. Fig. 6. Effects of FA treatment on the levels of MDM2, TP53, CDKN1A and CDKN1B protein in COLO-205.** (A) Treatment with FA (10  $\mu$ M) for 12 or 14 h increased the level of MDM2 protein in COLO-205. (B) The increased levels of TP53, CDKN1A and CDKN1B protein were observed in the COLO-205 after four days continuous treatment with FA (10  $\mu$ M).
